# Supplementary material for: Assessment of the Tolerance of a Chlorophyte Desmodesmus to CuO-NP for Evaluation of the Nanopollution Bioremediation Potential of This Microalga
Source: MDPI journal article supplement (doi:10.3390/nano13040737), 2023-02-15
Supplement: s1 [file s1]

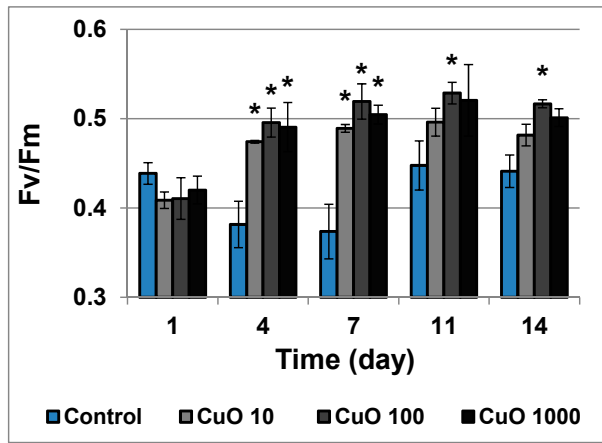

(a)

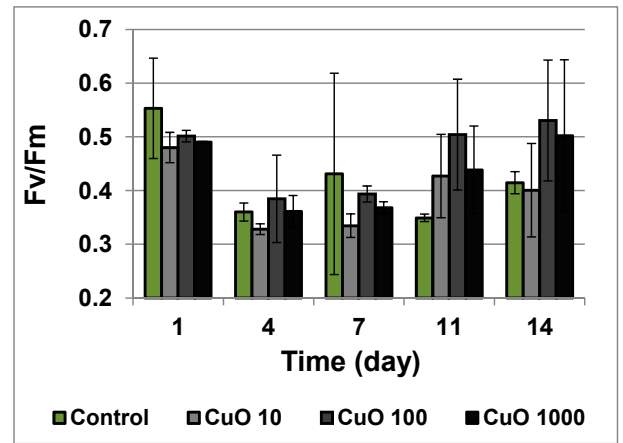

(b)

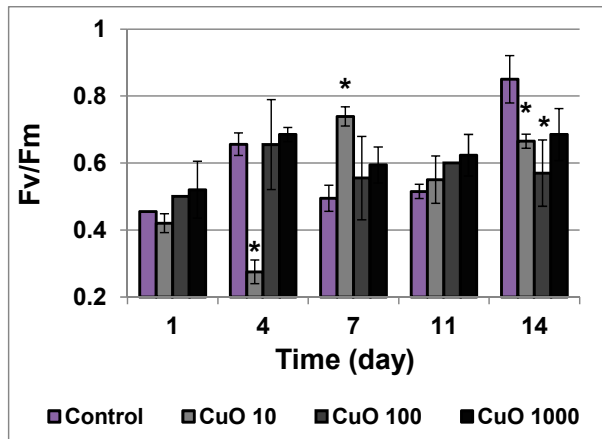

(c)

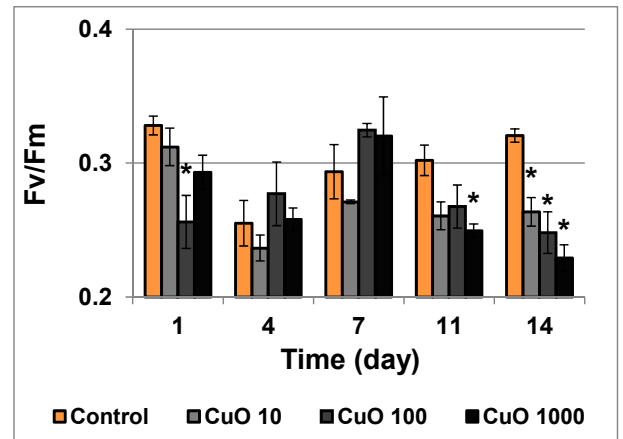

(d)

**Figure S1.** Preliminary screening of CuO-NP (10, 100 and 1000  $\mu\text{g L}^{-1}$ ) effects on different microalgal strains via PS II Qy (Fv/Fm): (a) *Desmodesmus* sp. IPPAS C-2014; (b) *Lobosphaera* sp. IPPAS C-2047; (c) *Desmodesmus* sp. 1 Dp66E-1; (d) *Micractinium simplicissimum* IPPAS C-2053. Average values significantly differing from the control at the 0.05 significance level are marked with asterisk, \*.

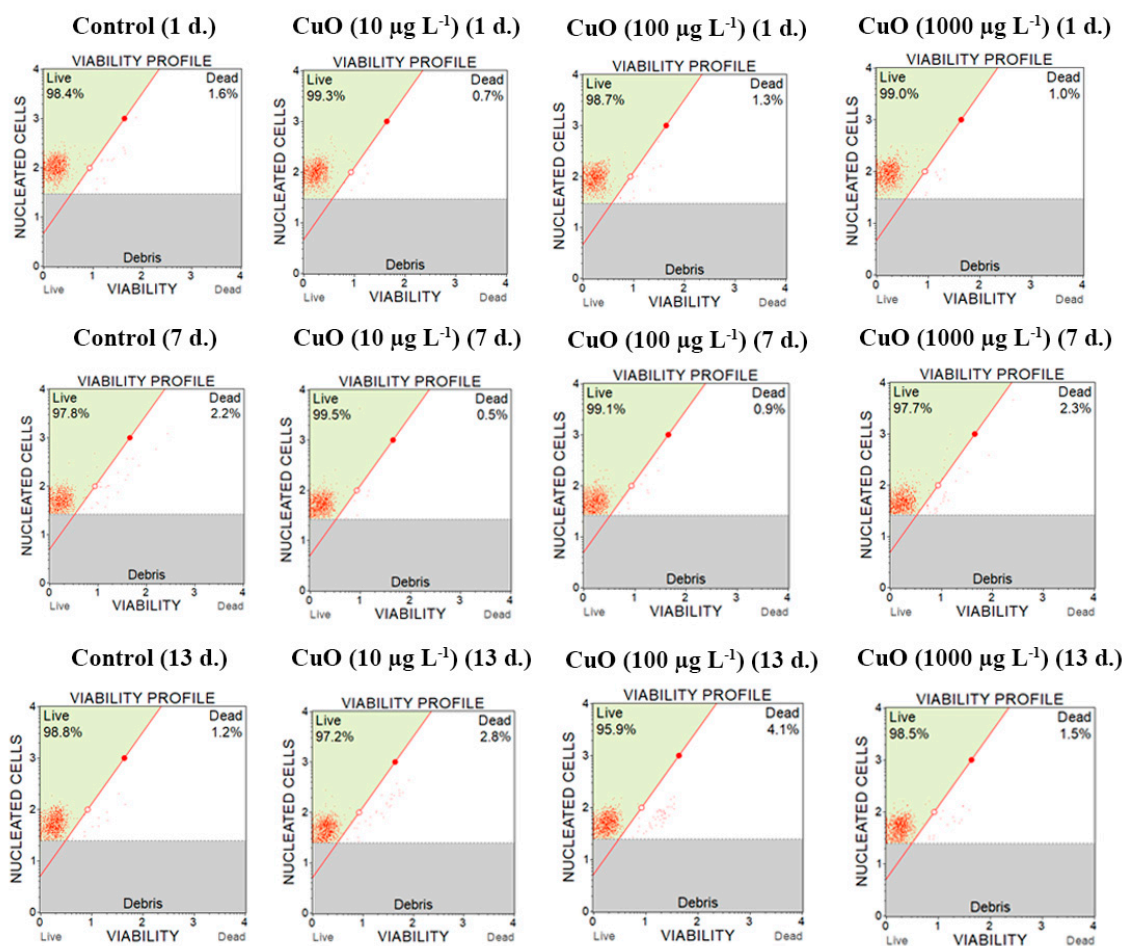

**Figure S2.** The analysis of the viability of *Desmodemus* sp. cells incubated with CuO-NP as compared to the untreated cells.

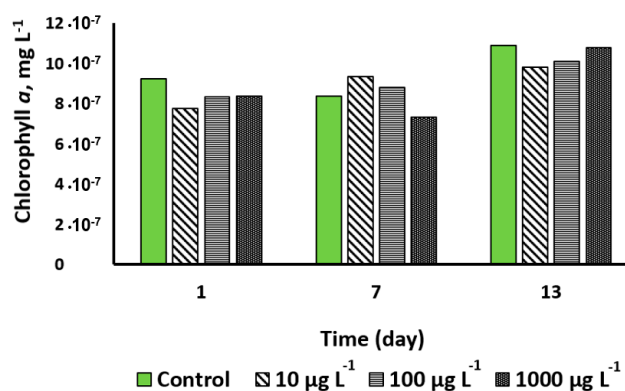

(a)

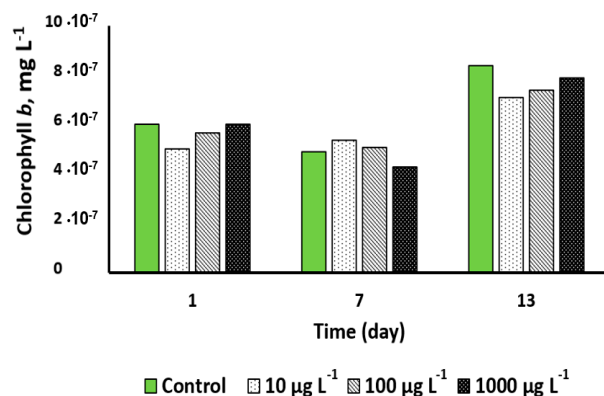

(b)

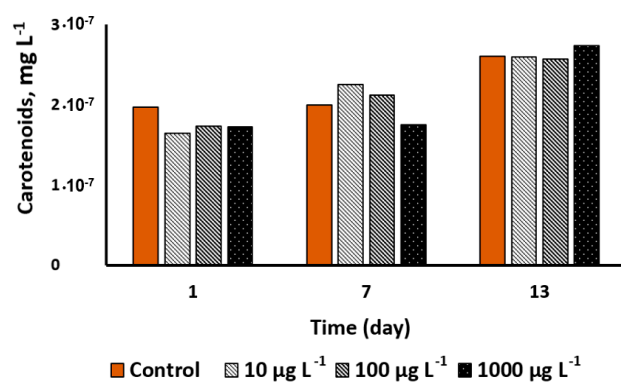

(c)

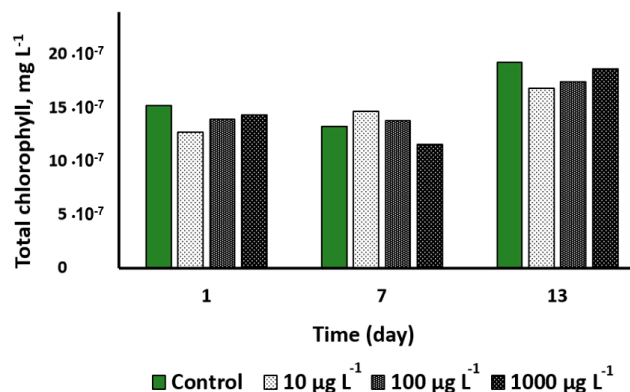

(d)

**Figure S3.** The dynamics of (a) chlorophyll a, (b) chlorophyll b; (c) total carotenoid, and (d) chlorophyll a + b content per cells of *Desmodemus* sp. incubated in the presence of different concentrations of CuO-NP
